# Supplementary material for: A comparative study of the effects of the Hofmeister series anions of the ionic salts and ionic liquids on the stability of α-chymotrypsin
Source: Royal Society of Chemistry journal article supplement (doi:10.1039/c4nj01596g), 2014-11-07
Supplement: c4nj01596g1.pdf [file c4nj01596g1.pdf]

## Supplementary Informations

### A comparative study of the Hofmeister series of anions of the ionic salts and ionic liquids on the stability of $\alpha$ -chymotrypsin

Awanish Kumar, Anjeeta Rani and Pannuru Venkatesu\*

Department of Chemistry, University of Delhi, Delhi – 110 007.

**Table 1S.** Transition temperature ( $T_m$ ), enthalpy change ( $\Delta H$ ) and heat capacity change ( $\Delta C_p$ ) determined by fluorescence spectroscopy and calculated Gibbs free energy changes ( $\Delta G_u$ ) in unfolding state at 25 °C for the  $\alpha$ -chymotrypsin (CT) in various concentrations of ionic liquids (ILs)<sup>a</sup>.

| Sample                             | $T_m$<br>(°C) | $\Delta H$<br>kcalmol <sup>-1</sup> | $\Delta G_u$<br>kcalmol <sup>-1</sup> | $\Delta C_p$<br>kcalmol <sup>-1</sup> K <sup>-1</sup> |
|------------------------------------|---------------|-------------------------------------|---------------------------------------|-------------------------------------------------------|
| Pure CT in buffer                  | 53.1          | 69.50                               | 3.03                                  | 2.36                                                  |
| 0.01 M [Bmim][SCN]                 | 52.1          | 69.24                               | 2.44                                  | 2.92                                                  |
| 0.02 M [Bmim][SCN]                 | 49.4          | 65.40                               | 2.03                                  | 3.09                                                  |
| 0.03 M [Bmim][SCN]                 | 47.9          | 50.43                               | 1.69                                  | 2.22                                                  |
| 0.04 M [Bmim][SCN]                 | 45.0          | 39.09                               | 1.51                                  | 1.52                                                  |
| 0.01 M [Bmim][HSO <sub>4</sub> ]   | 52.6          | 44.48                               | 1.35                                  | 2.14                                                  |
| 0.02 M [Bmim][HSO <sub>4</sub> ]   | 51.4          | 38.34                               | 1.39                                  | 1.58                                                  |
| 0.03 M [Bmim][HSO <sub>4</sub> ]   | 45.5          | 37.86                               | 1.78                                  | 1.23                                                  |
| 0.04 M [Bmim][HSO <sub>4</sub> ]   | 42.0          | 35.57                               | 2.03                                  | 0.96                                                  |
| 0.01 M [Bmim][Cl]                  | 57.6          | 94.24                               | 4.725                                 | 2.74                                                  |
| 0.02 M [Bmim][Cl]                  | 55.5          | 89.58                               | 4.22                                  | 2.79                                                  |
| 0.03 M [Bmim][Cl]                  | 54.6          | 85.95                               | 3.94                                  | 2.77                                                  |
| 0.04 M [Bmim][Cl]                  | 54.0          | 83.25                               | 3.74                                  | 2.74                                                  |
| 0.01 M [Bmim][Br]                  | 58.3          | 71.10                               | 3.63                                  | 2.02                                                  |
| 0.02 M [Bmim][Br]                  | 57.2          | 71.09                               | 3.52                                  | 2.09                                                  |
| 0.03 M [Bmim][Br]                  | 56.9          | 69.40                               | 3.41                                  | 2.10                                                  |
| 0.04 M [Bmim][Br]                  | 54.0          | 69.73                               | 3.13                                  | 2.29                                                  |
| 0.01 M [Bmim][CH <sub>3</sub> COO] | 59.6          | 83.74                               | 4.43                                  | 2.29                                                  |
| 0.02 M [Bmim][CH <sub>3</sub> COO] | 56.4          | 82.03                               | 3.97                                  | 2.48                                                  |
| 0.03 M [Bmim][CH <sub>3</sub> COO] | 55.8          | 79.03                               | 3.76                                  | 2.44                                                  |
| 0.04 M [Bmim][CH <sub>3</sub> COO] | 55.5          | 76.16                               | 3.59                                  | 2.37                                                  |
| 0.01 M [Bmim][I]                   | 49.6          | 43.78                               | 1.45                                  | 1.95                                                  |
| 0.02 M [Bmim][I]                   | 46.8          | 45.74                               | 1.41                                  | 2.17                                                  |
| 0.03 M [Bmim][I]                   | 42.0          | 35.33                               | 1.55                                  | 1.22                                                  |
| 0.04 M [Bmim][I]                   | 34.0          | 21.08                               | 2.31                                  | 3.10                                                  |

<sup>a</sup>Each Value is the average over three measurements. The error in  $T_m$  doesnot exceeds 0.1°C. The estimated relative uncertainties in ( $\Delta H$ ), ( $\Delta C_p$ ) and ( $\Delta G_u$ ) are around 2% of the reported values.

**Table 2S.** Transition temperature ( $T_m$ ), enthalpy change ( $\Delta H$ ) and heat capacity change ( $\Delta C_p$ ) determined by fluorescence spectroscopy and calculated Gibbs free energy changes ( $\Delta G_u$ ) in unfolding state at 25 °C for the  $\alpha$ -chymotrypsin (CT) in various concentrations of ionic salts (Is)<sup>a</sup>.

| Sample                                  | $T_m$<br>(°C) | $\Delta H$<br>kcalmol <sup>-1</sup> | $\Delta G_u$<br>kcalmol <sup>-1</sup> | $\Delta C_p$<br>kcalmol <sup>-1</sup> K <sup>-1</sup> |
|-----------------------------------------|---------------|-------------------------------------|---------------------------------------|-------------------------------------------------------|
| Pure CT in buffer                       | 53.1          | 69.50                               | 3.03                                  | 2.36                                                  |
| 0. 01 M NaSCN                           | 48.5          | 36.70                               | 1.35                                  | 1.50                                                  |
| 0. 02 M NaSCN                           | 47.3          | 35.99                               | 1.26                                  | 1.55                                                  |
| 0. 03 M NaSCN                           | 46.4          | 34.38                               | 1.16                                  | 1.57                                                  |
| 0. 04 M NaSCN                           | 46.2          | 32.87                               | 1.10                                  | 1.49                                                  |
| 0. 01 M Na <sub>2</sub> SO <sub>4</sub> | 52.7          | 35.40                               | 1.52                                  | 1.22                                                  |
| 0. 02 M Na <sub>2</sub> SO <sub>4</sub> | 50.1          | 36.16                               | 1.42                                  | 1.38                                                  |
| 0. 03 M Na <sub>2</sub> SO <sub>4</sub> | 45.7          | 34.70                               | 1.13                                  | 1.62                                                  |
| 0. 04 M Na <sub>2</sub> SO <sub>4</sub> | 45.0          | 34.38                               | 1.09                                  | 1.66                                                  |
| 0.01 M NaCl                             | 47.0          | 34.89                               | 1.21                                  | 1.53                                                  |
| 0.02 M NaCl                             | 45.2          | 32.55                               | 1.04                                  | 1.55                                                  |
| 0.03 M NaCl                             | 44.8          | 30.69                               | 0.96                                  | 1.50                                                  |
| 0.04 M NaCl                             | 43.6          | 30.30                               | 0.98                                  | 1.58                                                  |
| 0.01 M NaBr                             | 52.1          | 37.86                               | 1.60                                  | 1.34                                                  |
| 0.02 M NaBr                             | 52.0          | 37.07                               | 1.56                                  | 1.31                                                  |
| 0.03 M NaBr                             | 51.0          | 31.84                               | 1.29                                  | 1.17                                                  |
| 0.04 M NaBr                             | 49.5          | 29.23                               | 1.12                                  | 1.14                                                  |
| 0. 01 M NaCH <sub>3</sub> COO           | 48.0          | 35.54                               | 1.28                                  | 1.48                                                  |
| 0. 02 M NaCH <sub>3</sub> COO           | 46.7          | 34.83                               | 1.19                                  | 1.55                                                  |
| 0. 03 M NaCH <sub>3</sub> COO           | 46.7          | 33.97                               | 1.16                                  | 1.51                                                  |
| 0. 04 M NaCH <sub>3</sub> COO           | 44.5          | 33.57                               | 1.04                                  | 1.66                                                  |
| 0.01 M NaI                              | 51.6          | 38.36                               | 1.60                                  | 1.37                                                  |
| 0.02 M NaI                              | 51.0          | 38.09                               | 1.54                                  | 1.40                                                  |
| 0.03 M NaI                              | 48.4          | 38.64                               | 1.35                                  | 1.51                                                  |
| 0.04 M NaI                              | 46.2          | 34.04                               | 1.14                                  | 1.55                                                  |

<sup>a</sup>Each Value is the average over three measurements. The error in  $T_m$  doesnot exceeds 0.1°C. The estimated relative uncertainties in ( $\Delta H$ ), ( $\Delta C_p$ ) and ( $\Delta G_u$ ) are around 2% of the reported values.

## Fluorescence Spectroscopy

Cary Eclipse spectrofluorimeter from Varian optical spectroscopy instruments, Mulgrave, Victoria, Australia was used to monitor the fluorescence emission spectra of CT that was equipped with thermostated cell holders. The steady-state fluorescence measurements were conducted at a constant temperature using a circulating water bath controlled by a UV1007M192 Peltier device attached to the sample holder of the fluorimeter. The excitation wavelength was set at 295 nm in order to calculate the contribution of the tryptophan (Trp) residues to the overall fluorescence emission. The experiments were carried out in the range between 20 to 90 °C by using a 1.0 cm sealed cell and both excitation and emission slit width were set at 5 nm. The fluorescence intensity at the emission maximum for the native enzyme (~332 nm) was continuously recorded as the temperature was decreased from 20 to 90 °C at an approximate rate of 1.0 °C/min. This allowed the samples to attain thermal equilibrium before the measurements.

## Thermodynamic analysis of proteins from the fluorescence curves

The unfolding of proteins has been observed to approach closely a two-state folding mechanism experimentally such as that shown in equation 1.

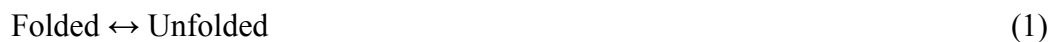

Experimentally, the fraction of unfolded molecules is measured by the intensity of the emission. The fraction unfolded is determined as

$$\alpha = \frac{[U]}{([F] + [U])} \quad (2)$$

$$\alpha = \frac{(I_f - I)}{(I_f - I_u)} \quad (3)$$

In an equation,  $\alpha$  is the fraction of unfolded molecules,  $I$  is the measured intensity at a given temperature,  $I_f$  is the measured intensity of the folded state, and  $I_u$  is the intensity of the completely unfolded state. The transition temperature of the protein ( $T_m$ ) is the temperature at which  $\alpha = 0.5$ . The importance as well as the details of obtaining the thermodynamic parameters such as free energy change of unfolding ( $\Delta G_u$ ), enthalpy changes ( $\Delta H$ ), and heat capacity change ( $\Delta C_p$ ) through fluorescence thermal analysis is recently elucidated elsewhere.<sup>1-4</sup>

The equilibrium constant ( $K_{eq}$ ) between the native and the denatured states at a given temperature was obtained using the following equation

$$K_{eq} = \frac{\alpha}{1 - \alpha} \quad (4)$$

The difference in free energy between the denatured and the native conformations ( $\Delta G$ ) can then be calculated using the equation as below,

$$\Delta G = -RT \ln K_{eq} \quad (5)$$

Where,  $R$  is the gas constant ( $1.987 \text{ Cal mol}^{-1}$ ) and  $T$  is the absolute temperature.

The entropy changes ( $\Delta S$ ) were calculated using the laws of thermodynamics; we have a relation as shown through a relation as below,

$$\Delta S = \left[ \frac{-\partial \Delta G}{\partial T} \right]_P \quad (6)$$

And therefore,  $\Delta S$  (at  $T_m$ ) =  $\Delta S_m$  = the slope of  $\Delta G$  vs  $T$ .

$\Delta H$  is needed at only a single temperature, and the best temperature to use is  $T_m$ , the midpoint of the thermal unfolding curve where  $K_{eq} = 1$ . Therefore, at  $T_m$  the free energy change can be termed as ( $\Delta G(T_m)$ ) and can be expressed as below,

$$\Delta G(T_m) = 0 = \Delta H_c - T_c \Delta S_c \quad (7)$$

Now the  $\Delta H_m = (T_m \text{ in K}) \times (\text{slope at } T_m)$ .

Additionally, the heat capacity change was obtained as shown below,

$$\Delta S = \Delta C_p \ln (T_m / T_s) \quad (8)$$

Where,  $T_s$  is referred to as the standard temperature at which the stability of the protein is maximum.

The obtained values were used to calculate the  $\Delta G$  of unfolding at any temperature  $T$ , using Gibbs Helmholtz equation as shown below,

$$\Delta G(T) = \Delta H_m \left[ 1 - \left( \frac{T}{T_m} \right) \right] - \Delta C_p \left[ (T_m - T) + T \ln \left( \frac{T}{T_m} \right) \right] \quad (9)$$

## References:

1. P. L. Privalov, *Crit. Rev. Biochem. Mol. Biol.*, 1990, **25**, 281-306.
2. P. L. Privalov, Y. V. Griko, S. Y. Venyaminov, *J. Mol. Biol.* 1986, **190**, 487-498.
3. S. N. Baker, T. M. McCleskey, S. Pandey, G. A. Baker, *Chem. Commun.* 2004, 940-941.
